# Supplementary material
Source: PubMed Central journal article supplement (PMC2586276)

**Supplementary Figure 1. ESI/MS/MS analyses of native and de-acetylated S2A.** *Panel A*, Positive ESI mass spectra of native (N) and de-acetylated (DA) non-active S2A were obtained, and demonstrated a shift of approximately two acetyl groups (84 amu) when comparing major intact GPL ions (i.e.  $m/z$  1595 vs.  $m/z$  1511, and  $m/z$  1561 vs.  $m/z$  1477). *Panel B*, Major intact GPL ions were selected for collisionally activated dissociation (CAD). At a collision energy of 20 eV, product ions were produced, signifying the GPL ion with a loss of sugar moieties.

**Supplementary Figure 2. Partial 1D  $^1\text{H}$  NMR spectrum of S2A.** Four dominant  $-\text{OCH}_3$  signals and two dominant signals from the acetyl  $\text{CH}_3$  groups could be observed for native S2A.

**Supplementary Figure 3. Positive ESI mass spectra analyses of native and de-acetylated NS3.**

When comparing the  $m/z$  values for native (N) and de-acetylated (DA) intact GPL ions, a shift of approximately one acetyl group (42 amu) was observed ( $m/z$  1233 vs.  $m/z$  1191, and  $m/z$  1246 vs.  $m/z$  1205). There was another ion ( $m/z$  1219) that was observed in both the N and DA spectra indicating the non-acetylated nsGPL that also comprises NS3. All relevant ions are circled.

**Supplementary Figure 4. 1D  $^1\text{H}$  NMR spectrum of NS2 in  $\text{CDCl}_3$ .** *Panel A*, Full spectrum. *Panels B-F*, Expansions of select regions in (A) showing signal assignments for the 6-deoxytalose (dT) and rhamnose (R) residues.

**Supplementary Figure 5. 2D  $^1\text{H}$ - $^1\text{H}$  NMR spectrum of NS2 in  $\text{CDCl}_3$ .** *Panel A*, The H1-H2 cross-peaks for the 6-deoxytalose (dT) and the rhamnose (R) were used to initiate signal assignments in each residue (traces shown). *Panel B*, 2D  $^1\text{H}$ - $^1\text{H}$  ROESY spectrum of NS2 showing ROEs for H1<sub>R</sub>, H1<sub>dT</sub>, and H4<sub>dT</sub>. SC denotes correlations to side-chain nuclei. R: rhamnose; dT: 6-deoxytalose.

**Assignment of  $^1\text{H}$  chemical shifts, anomeric configuration and substitution pattern for native NS2.**

The 1D  $^1\text{H}$  NMR spectrum of NS2 contains two anomeric proton signals at 5.051 ppm and 4.798 ppm (Supplementary Table 1; Supplementary Fig. 5A, 5B). These signals gave identical integrations, and both were split by a small  $^3J_{\text{H1,H2}}$  coupling (1.7 Hz and 1.8 Hz, respectively). Analysis of the 2D  $^1\text{H}$ - $^1\text{H}$  COSY spectrum (Supplementary Fig. 6A) provided chemical shift assignments of all non-anomeric protons in each residue (Supplementary Fig. 5B-F), and more detailed interpretation of these signals in the 1D spectrum yielded a complete set of  $^3J_{\text{HH}}$  values in each residue (Supplementary Table 2). Absolute configurations of the residues were not confirmed; it is assumed they were in the L-configuration. Anomeric configurations were confirmed by comparing  $^3J_{\text{H1,H2}}$  values in the NS2 6-deoxytalose and rhamnose with those observed in standard talo- and mannopyranosyl rings and were in agreement with the  $\alpha$ -anomers.

The 1D  $^1\text{H}$  NMR spectrum of NS2 contained four intense singlets (Supplementary Fig. 5A, 5C) that gave identical integrations (three protons each), consistent with  $\text{CH}_3$  groups. Three of these signals were observed at 3.4-3.5 ppm and were assigned to methyl ether ( $-\text{OCH}_3$ ) protons (Supplementary Table 1). The remaining singlet at 2.177 was assigned to the  $\text{CH}_3$  of an acetyl group. Analysis of the H2<sub>dT</sub> and H2<sub>R</sub> multiplets revealed the presence of  $^3J_{\text{HCOH}}$  couplings in both cases (7.9 Hz, and 2.3 Hz, respectively;  $\text{CDCl}_3$  solvent), showing that OH2 in both residues is unsubstituted (Supplementary Table 2). Since both residues are 6-deoxyhexopyranosyl rings, the remaining four OH groups (OH3 and OH4 of both residues) must therefore be substituted, since four  $\text{CH}_3$  signals were observed.

To determine the substitution pattern, two approaches were taken.  $^1\text{H}$  chemical shift differences were calculated for the NS2 6-deoxytalose and rhamnose residues, and for standard unsubstituted talo- and mannopyranosyl residues, using H1 as the reference signal. Since OH2 in both residues is unsubstituted,  $\delta_{\text{H1}}-\delta_{\text{H2}}$  serves as a reasonable internal control, which is confirmed by the good agreement

observed between the NS2 6-deoxytalose and the  $\alpha$ -talo standard, and between the NS2 rhamnose and the  $\alpha$ -manno standard (Supplementary Table 3) (these differences also confirm the anomeric configuration of the NS2 6-deoxytalose and rhamnose). Values of  $\delta_{H1}-\delta_{H3}$  and  $\delta_{H1}-\delta_{H4}$  in the NS2 6-deoxytalose and rhamnose are *more positive* in three cases than the *positive* difference calculated in the reference compound, whereas in one case ( $\delta_{H1}-\delta_{H4}$  of the NS2 6-deoxytalose), the difference is *negative* compared to a *positive* difference calculated in the reference. These results support the conclusion that OH3 and OH4 of NS2 rhamnose, and OH3 of NS2 6-deoxytalose are substituted as methyl ethers, and the remaining site, OH4 of 6-deoxytalose, is acetylated. *O*-Methylation of a CH-OH fragment thus induces a modest upfield shift of the CH proton, whereas *O*-acetylation induces a significant downfield shift.

The above substitution pattern was supported by an analysis of the  $^1\text{H}$ - $^1\text{H}$  2D ROESY spectrum of NS2 (Supplementary Fig. 6B). Inspection of the  $\text{H4}_{dT}$  cross-peaks revealed strong correlations to H3 and H5, a moderate correlation to the most upfield ether  $-\text{OCH}_3$  (presumably at O3), and a very weak correlation to the acetyl  $\text{CH}_3$ . This pattern is consistent with the proposed substitutions in the NS2 6-deoxytalose. In this interpretation, it is assumed that the acetyl  $\text{CH}_3$  is, on average, relatively far removed from H4 due to conformation about the C4-O4 bond, and that conformation about the C3-O3 bond results in an average orientation of the  $\text{CH}_3$  that places it relatively close to H4. The ROESY data also confirm free  $-\text{OH}$  groups in the NS2 6-deoxytalose and rhamnose, since H1 in both residues exhibits an NOE to the corresponding OH2 proton.

## Supplementary Table 1

**Table 1.**  $^1\text{H}$  chemical shifts of sample NS2

| residue           | chemical shift (ppm) |       |       |        |       |       |       |                                |                                |                             |
|-------------------|----------------------|-------|-------|--------|-------|-------|-------|--------------------------------|--------------------------------|-----------------------------|
|                   | H1                   | H2    | H3    | H4     | H5    | H6    | OH2   | CH <sub>3</sub> (1)<br>(ether) | CH <sub>3</sub> (2)<br>(ether) | CH <sub>3</sub><br>(acetyl) |
| deoxyTalo<br>(dT) | 5.051                | 3.802 | 3.562 | ~5.307 | 3.950 | 1.158 | 2.790 | 3.418                          |                                | 2.177                       |
| Rhamno<br>(R)     | 4.798                | 4.002 | 3.452 | 3.057  | 3.619 | ~1.26 | 2.633 | 3.525                          | 3.468                          |                             |

<sup>a</sup>In CDCl<sub>3</sub>; 22 °C; chemical shifts referenced to the internal residual CHCl<sub>3</sub> signal (7.270 ppm).

## Supplementary Table 2

**Table 2.**  $^1\text{H}$ - $^1\text{H}$  spin-couplings in sample NS2

| residue                      | $^1\text{H}$ - $^1\text{H}$ spin coupling (Hz) <sup>a</sup> |                      |                      |                      |                      |                      |                       |
|------------------------------|-------------------------------------------------------------|----------------------|----------------------|----------------------|----------------------|----------------------|-----------------------|
|                              | $^3J_{\text{H1,H2}}$                                        | $^3J_{\text{H2,H3}}$ | $^3J_{\text{H3,H4}}$ | $^3J_{\text{H4,H5}}$ | $^3J_{\text{H5,H6}}$ | $^4J_{\text{H2,H4}}$ | $^3J_{\text{H2,OH2}}$ |
| deoxyTalo<br>(dT)            | 1.7                                                         | ~3.1                 | ~3.1                 | ~1.2                 | 5.7                  | 1.2                  | 7.9                   |
| Rhamno<br>(R)                | 1.8                                                         | 3.4                  | 9.1                  | ~9.5                 | 5.8                  |                      | 2.3                   |
| $\alpha$ -Talo <sup>b</sup>  | 1.9                                                         | 3.2                  | 3.2                  | 1.3                  |                      | 1.4                  |                       |
| $\beta$ -Talo <sup>b</sup>   | 1.2                                                         | 3.2                  | 3.3                  | 1.2                  |                      | 1.2                  |                       |
| $\alpha$ -Talo <sup>c</sup>  | ~1.9                                                        | 3.4                  | ~3.5                 | ~1.3                 |                      |                      |                       |
| $\alpha$ -Manno <sup>c</sup> | 1.8                                                         | 3.5                  | 9.5                  |                      |                      |                      |                       |
| $\beta$ -Manno <sup>c</sup>  | 0.9                                                         | 3.2                  | 9.6                  |                      |                      |                      |                       |

<sup>a</sup>In Hz  $\pm$  0.1 unless otherwise noted; in CDCl<sub>3</sub>; 22° C. <sup>b</sup>Data for  $\alpha$ - and  $\beta$ -D-talopyranoses taken from Ref. 1. <sup>c</sup>Data for methyl  $\alpha$ -D-talopyranosides and methyl  $\alpha$ - and  $\beta$ -D-mannopyranosides, taken from Ref. 2.

Ref. 1: Snyder, J. R., Johnston, E. R., and Serianni, A. S. (1989) *J Am Chem Soc* **111**, 2681-2687

Ref. 2: Podlasek, C. A., Wu, J., Stripe, W. A., Bondo, P. B., and Serianni, A. S. (1995) *J Am Chem Soc* **117**, 8635-8644

### Supplementary Table 3

**Table 3.**  $^1\text{H}$  chemical shift differences for residues 6-deoxytalose (dT) and rhamnose (R) in NS2, and for unsubstituted manno- and talopyranosyl rings.

| residue                      | $^1\text{H}$ chemical shift difference (ppm) |                                   |                                   |
|------------------------------|----------------------------------------------|-----------------------------------|-----------------------------------|
|                              | $\delta\text{H1}-\delta\text{H2}$            | $\delta\text{H1}-\delta\text{H3}$ | $\delta\text{H1}-\delta\text{H4}$ |
| dT                           | 1.25                                         | 1.49                              | -0.26                             |
| $\alpha$ -Talo <sup>a</sup>  | 1.41                                         | 1.32                              | ~1.34                             |
| $\beta$ -Talo <sup>a</sup>   | 0.87                                         | 1.00                              | ~-0.95                            |
| R                            | 0.80                                         | 1.35                              | 1.74                              |
| $\alpha$ -Manno <sup>b</sup> | 0.83                                         | 1.00                              | 1.12                              |
| $\beta$ -Manno <sup>b</sup>  | 0.59                                         | 0.94                              | 1.01                              |

<sup>a</sup>Data for  $\alpha$ - and  $\beta$ -D-talopyranoses taken from Ref. 1. <sup>b</sup>Data for methyl  $\alpha$ - and  $\beta$ -D-mannopyranosides taken from Ref. 2

Ref. 1: Snyder, J. R., Johnston, E. R., and Serianni, A. S. (1989) *J Am Chem Soc* **111**, 2681-2687

Ref. 2: Podlasek, C. A., Wu, J., Stripe, W. A., Bondo, P. B., and Serianni, A. S. (1995) *J Am Chem Soc* **117**, 8635-8644

Supplementary Figure 1

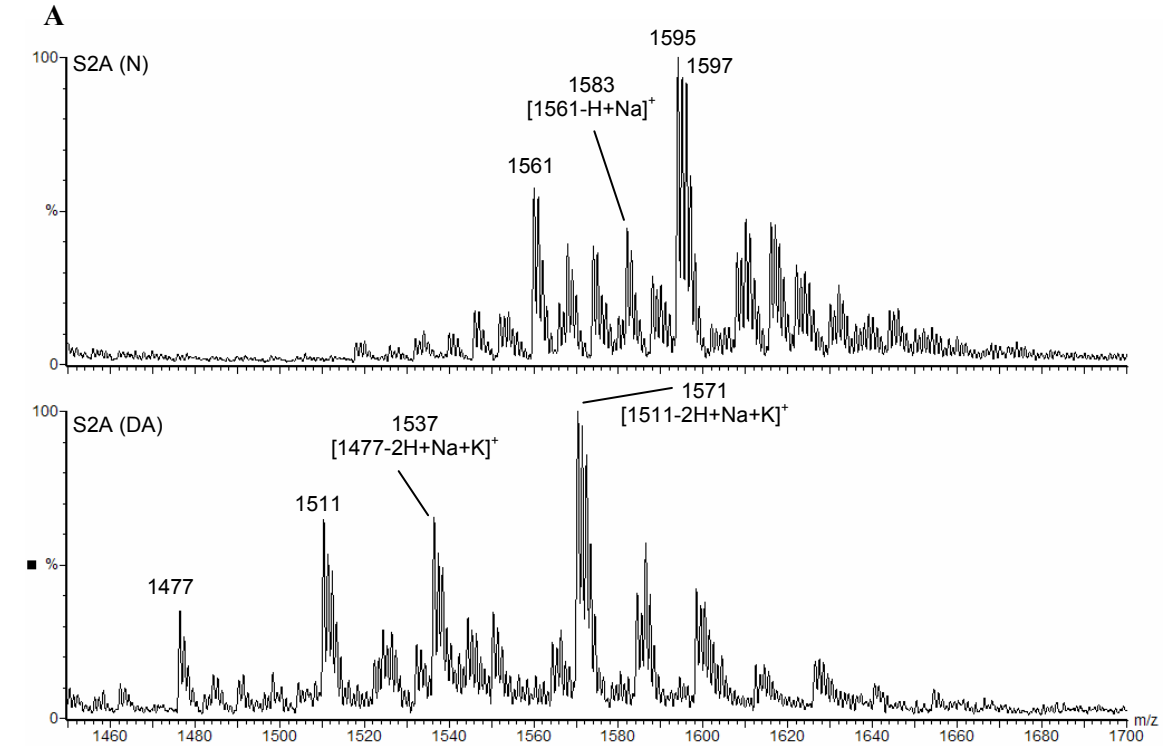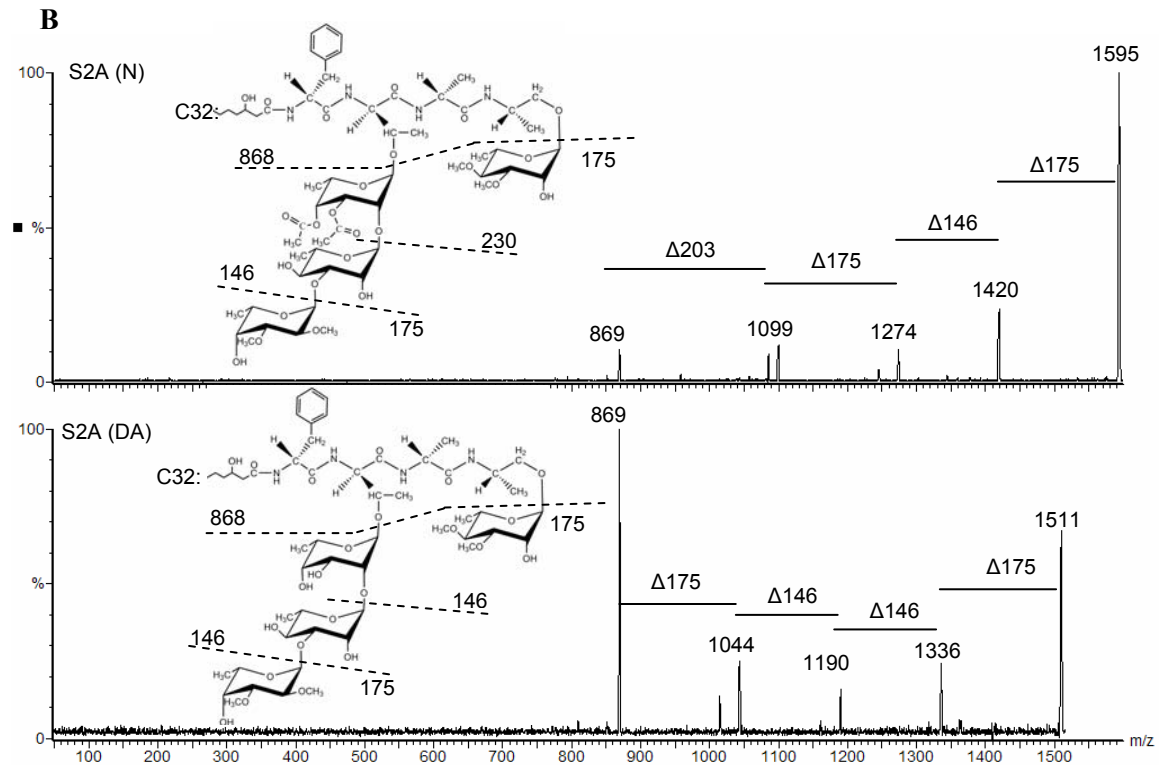

## Supplementary Figure 2

4 x CH<sub>3</sub> (ethers)

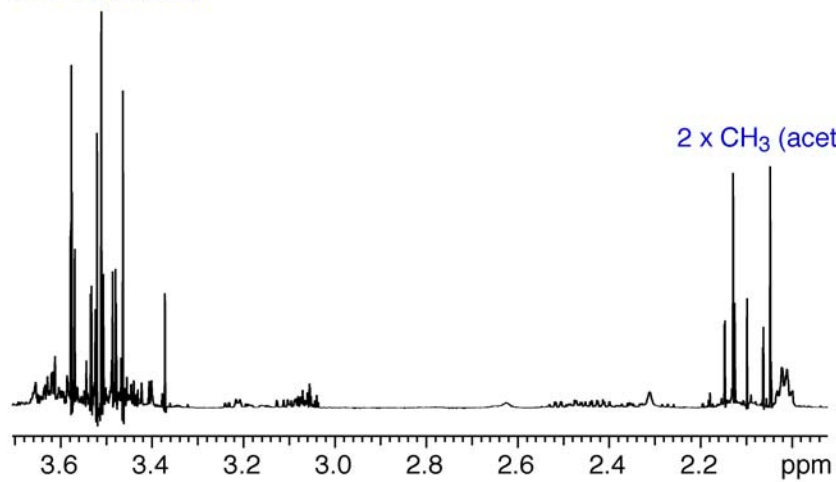

Supplementary Figure 3

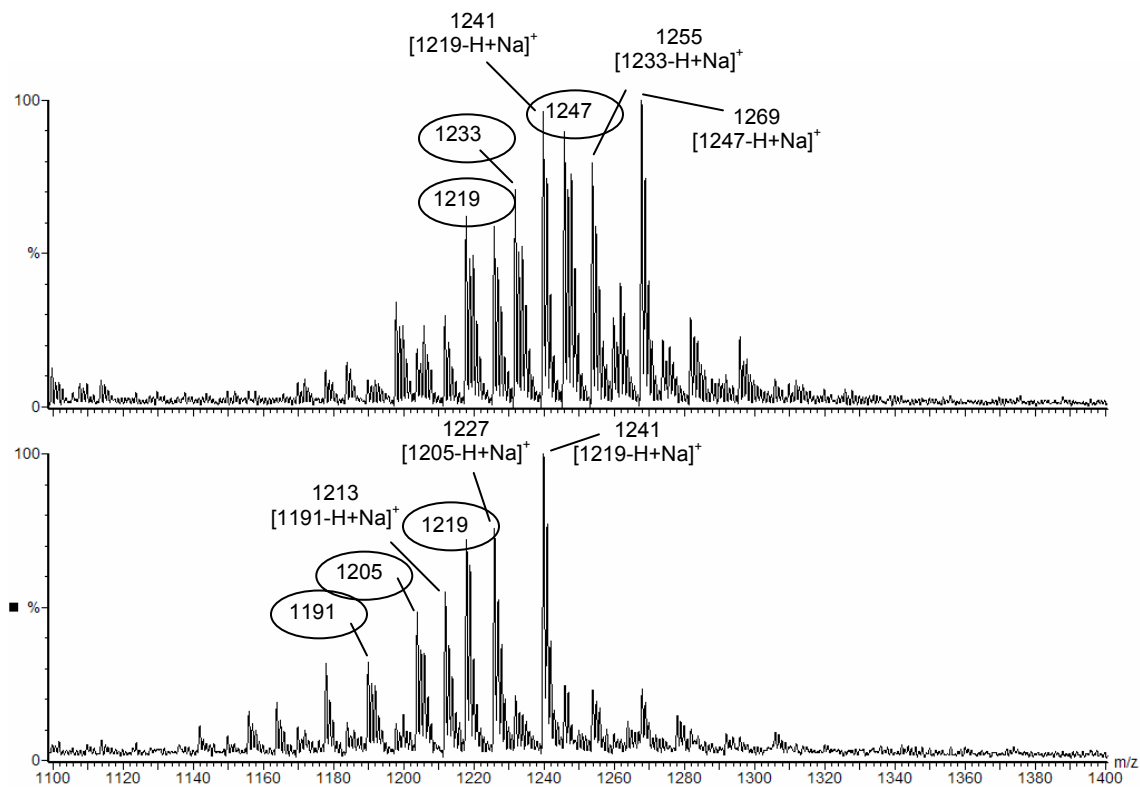

Supplementary Figure 4

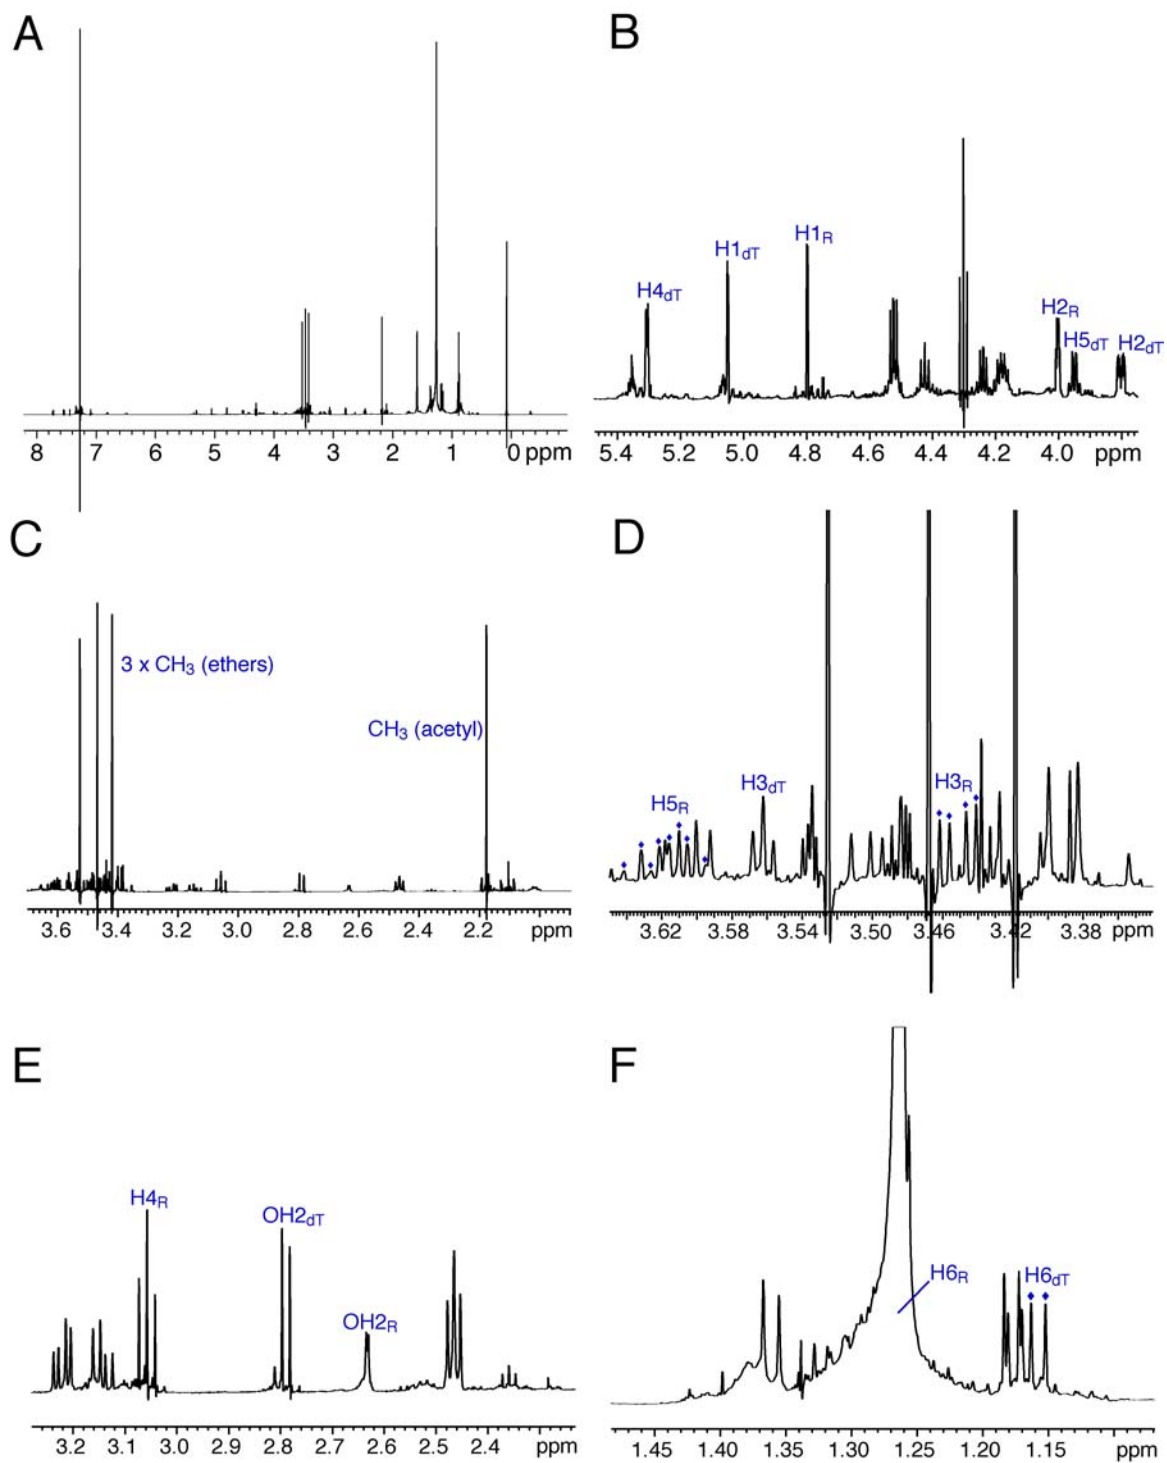



Supplementary Figure 5

A

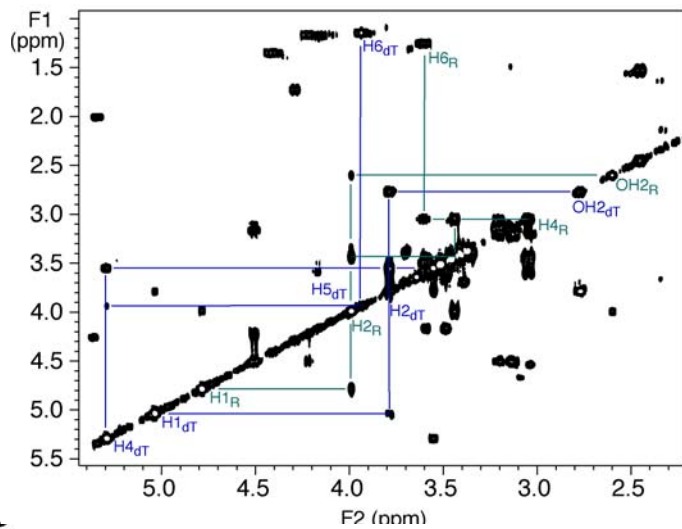

B

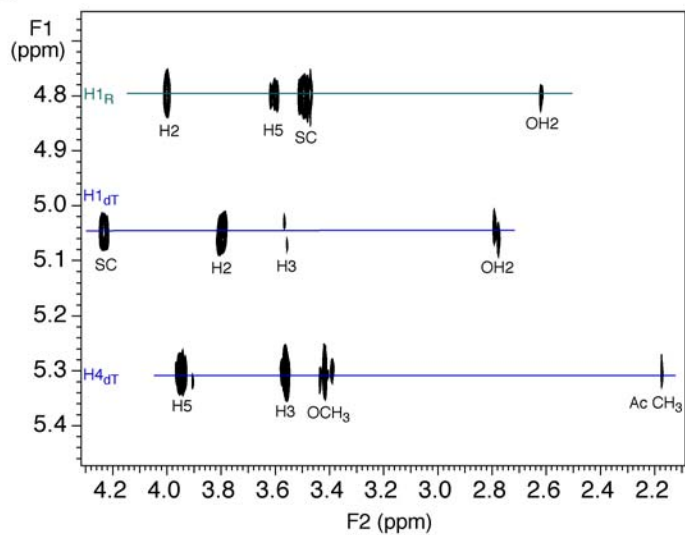

Supplement: M805539200_1.pdf [file M805539200_1.pdf]
